# Supplementary material for: Aggregation Behavior, Antibacterial Activity and Biocompatibility of Catanionic Assemblies Based on Amino Acid-Derived Surfactants
Source: PubMed Central journal article supplement (PMC7727793; doi:10.3390/ijms21238912), 2020-11-24
Supplement: ijms-21-08912-s001.pdf [file ijms-21-08912-s001.pdf]

## SUPPLEMENTARY MATERIALS

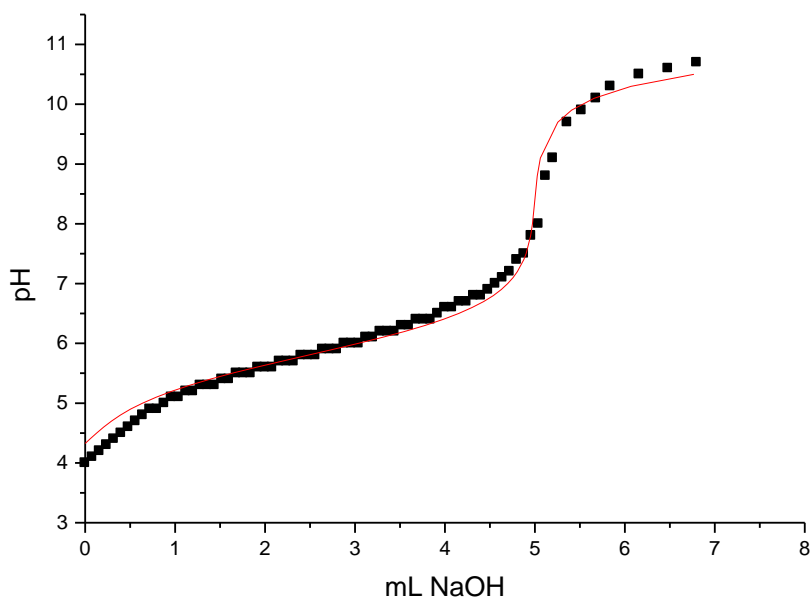

Figure S1. Titration of surfactant DMHNC<sub>14</sub> at 25°C. The curve shows the fitting of the experimental points to the acid base equations including the presence of CO<sub>2</sub>.

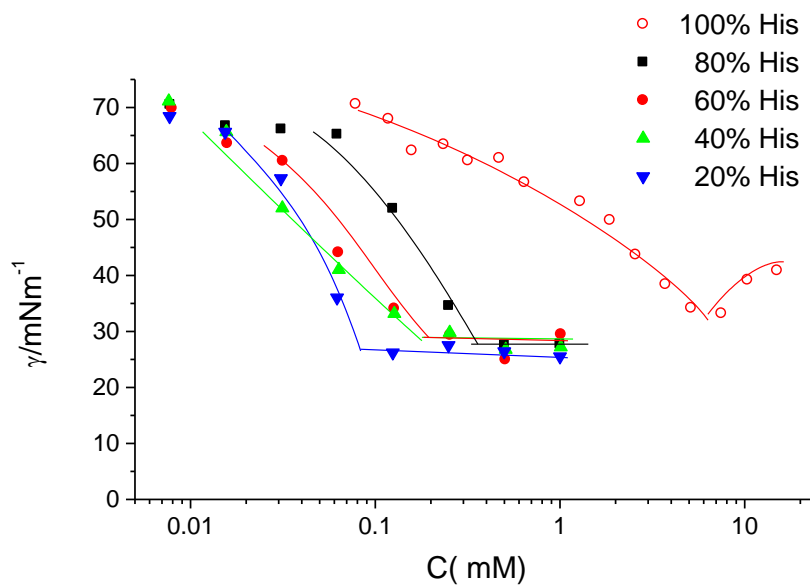

Figure S2. Surface tension as a function of concentration for mixtures of histidine surfactant with C<sub>12</sub>C<sub>3</sub>L at 25 °C

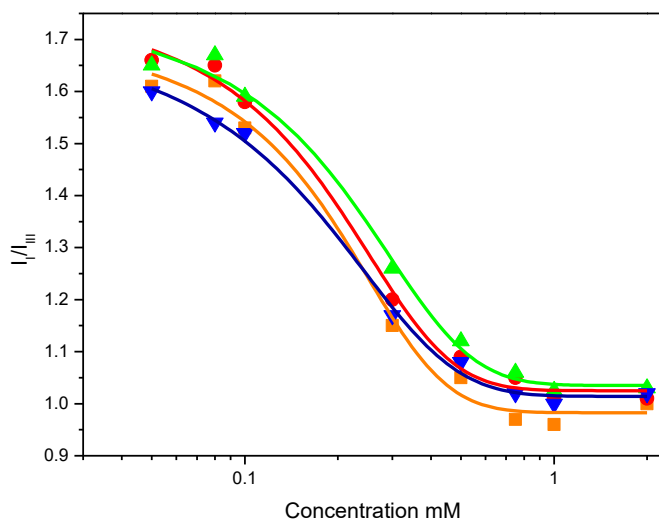

Figure S3. I<sub>1</sub>/I<sub>3</sub> values for pyrene as a function of DMHNHC14/C3C12L cationic mixtures concentration (■ 20:80HL ● 40:60 ▲ 60:80HL ▼ 80:20HL)

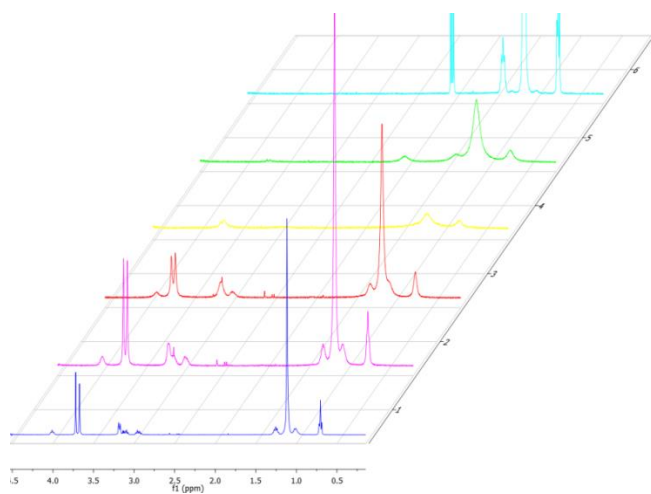

Figure S4. <sup>1</sup>H NMR of the pure surfactants and the cationic mixtures obtained from 5 mM solutions at 25 °C (1 Histidine, 2 80:20HM, 3 60:40HM, 4 40:60HM, 5 20:80HM, 6 Myristate)

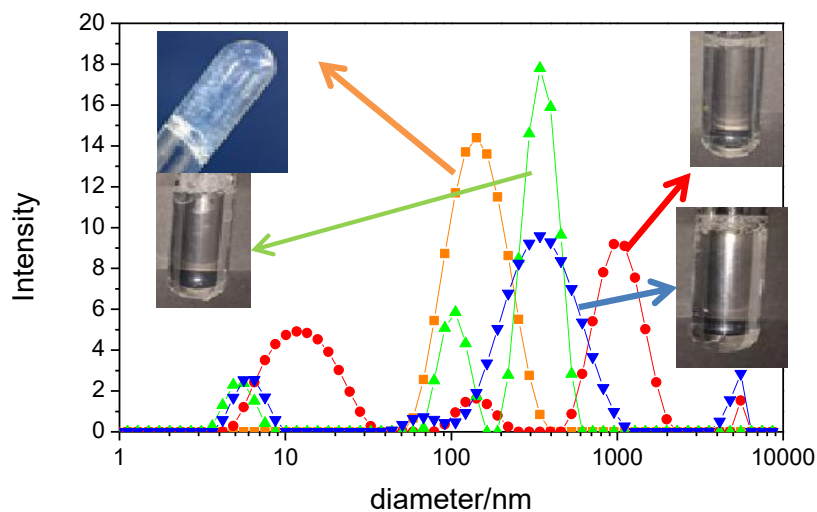

Figure S5. Intensity as a function of diameter as obtained from dynamic light scattering obtained at 25 °C for the different compositions of DMHNHC14/C<sub>3</sub>C<sub>12</sub>L  
 ▼ 80:20HL ▲ 60:80HL ● 40:60 ■ 20:80HL

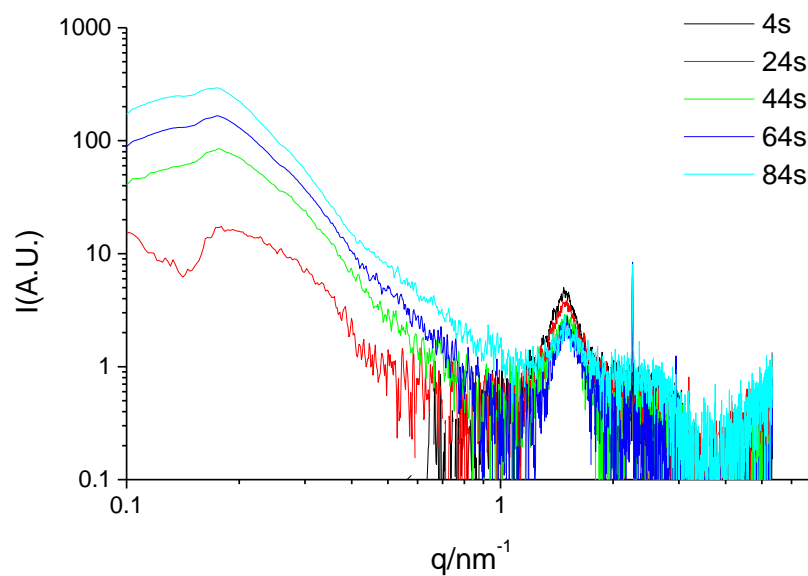

Figure S6. DMHNHC14/C<sub>3</sub>C<sub>12</sub>L 80:20 HL SAXS intensity as a function of scattering vector  $q$  at different times. Note that the peak at  $1=1.5 \text{ nm}^{-1}$  decreases in intensity while the intensity at small  $q$  increases. The peak at  $q=2.25 \text{ nm}^{-1}$  appears after 10 s measurement.

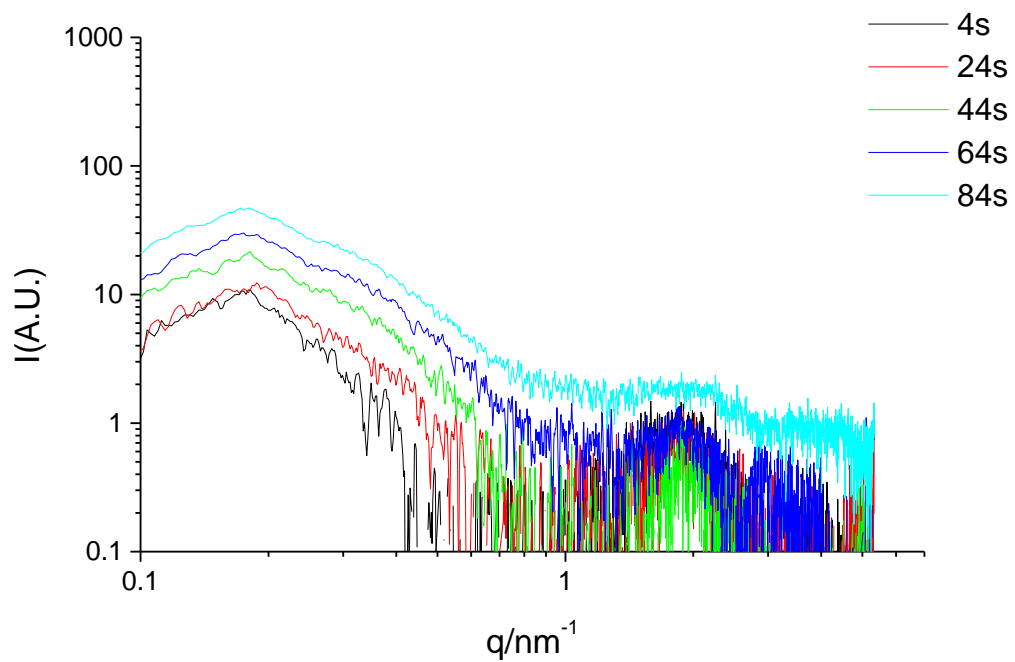

Figure S7. DMHNHC14/C<sub>3</sub>C<sub>12</sub>L 40:60 HL SAXS intensity as a function of scattering vector  $q$  at different times.. The overall intensity increases with time, the band around  $2 \text{ nm}^{-1}$  becomes less marked.

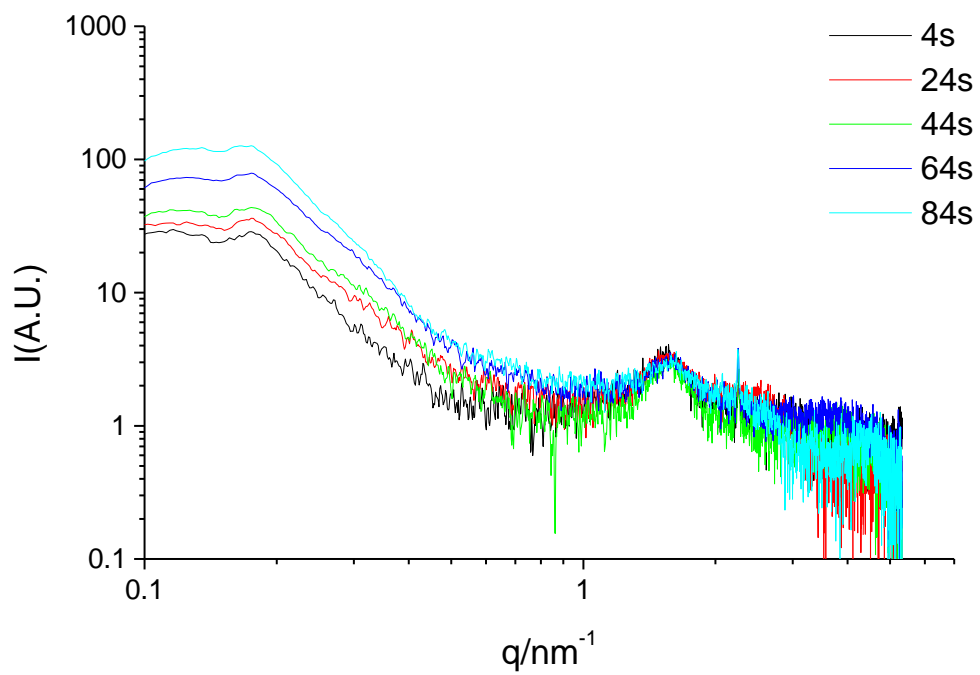

Figure S8. DMHNHC14/C<sub>3</sub>C<sub>12</sub>L 20:80 HL SAXS intensity as a function of scattering vector  $q$  at different times... The behaviour is similar to 80:20 HL but the peak at  $q= 2.25 \text{ nm}^{-1}$  appears after 30 s.

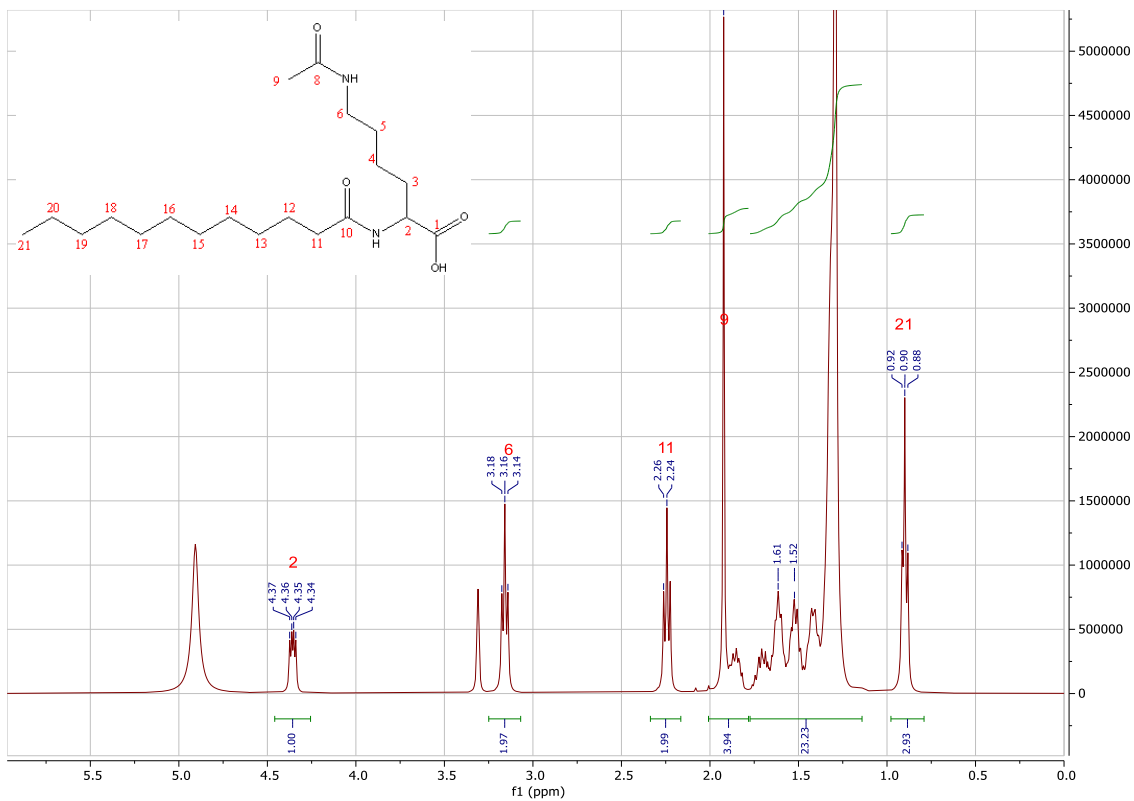

Figure S9.  $^1\text{H}$ NMR spectrum of  $\text{C}_{12}\text{C}_3\text{L}$

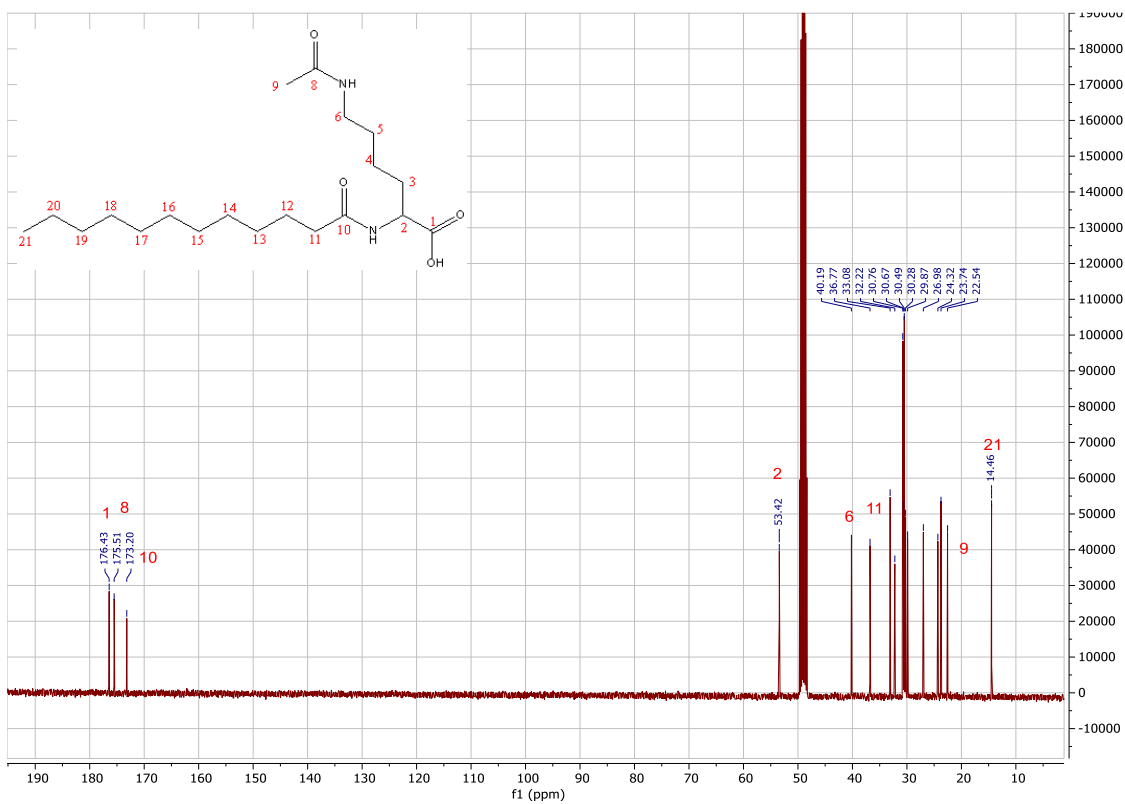

Figure S10.  $^{13}\text{C}$ NMR spectrum of  $\text{C}_{12}\text{C}_3\text{L}$

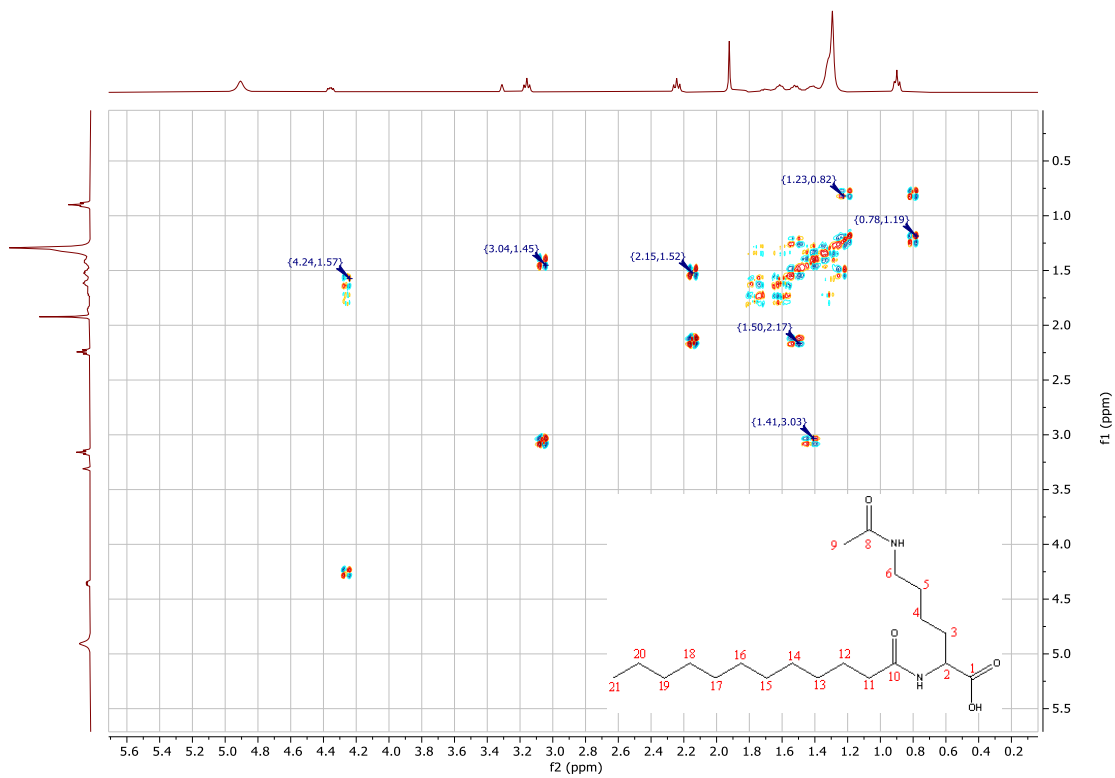

Figure S11. COSY spectrum of C<sub>12</sub>C<sub>3</sub>L

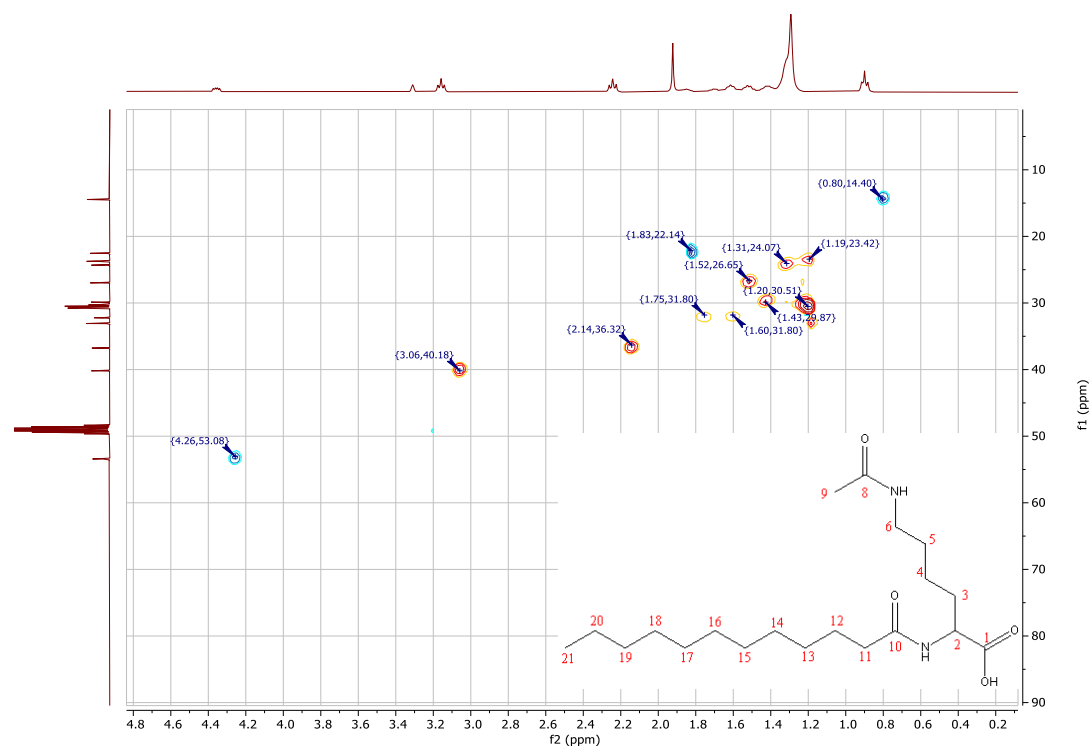

Figure S12. HSQC spectrum of C<sub>12</sub>C<sub>3</sub>L

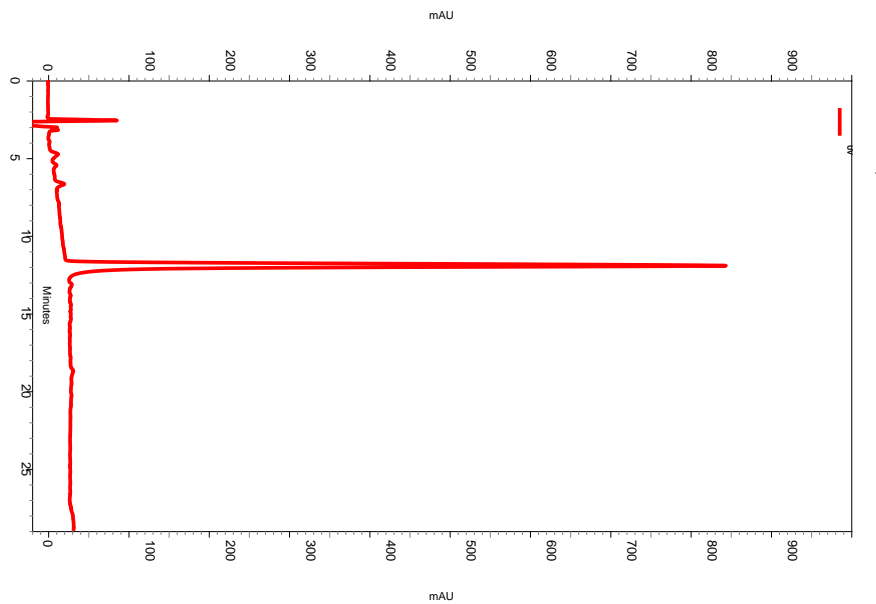

Figure S13. HPLC chromatogram of C<sub>12</sub>C<sub>3</sub>L

Table S1 Surface tension and fluorescence aggregation parameters of the pure surfactants and the cationic mixtures and  $\zeta$ -potential of the mixtures.

| His%    | $\alpha$ His <sup>1</sup> | $A_m$ <sup>2</sup> | $CMC_\gamma$ <sup>3</sup> | $\gamma_{cmc}$ <sup>4</sup> | $CMC_F$ <sup>3</sup> | $\zeta$ -potential <sup>5</sup> |
|---------|---------------------------|--------------------|---------------------------|-----------------------------|----------------------|---------------------------------|
| 100     | 1                         | 57                 | 5.2                       | 33                          | 3.8                  |                                 |
| 80:20HL | 0.748                     | 19                 | 0.33                      | 28                          | 0.07                 | +41mV                           |



|         |       |    |      |      |      |       |
|---------|-------|----|------|------|------|-------|
| 60:40HL | 0.527 | 22 | 0.19 | 28   | 0.15 | +41mV |
| 40:60HL | 0.331 | 30 | 0.17 | 29.5 | 0.13 | +41mV |
| 20:80HL | 0.157 | 14 | 0.09 | 26.5 | 0.15 | ~0    |

---

<sup>1</sup> Histidine molar fraction in the mixture.

<sup>2</sup> Area per molecule according to Gibbs adsorption isotherm using  $n=1$  in  $\text{nm}^2$ .

<sup>3</sup> CMC obtained by surface tension or Fluorescence in mM.

<sup>4</sup> Surface tension at CMC in  $\text{mNm}^{-1}$ .

<sup>5</sup>  $\zeta$ -potential in mV.
